# Supplementary material for: Chemical basis for the recognition of trimethyllysine by epigenetic reader proteins
Source: PubMed Central journal article supplement (PMC4673829; doi:10.1038/ncomms9911), 2015-11-18
Supplement: ncomms9911-s1.pdf [file ncomms9911-s1.pdf]

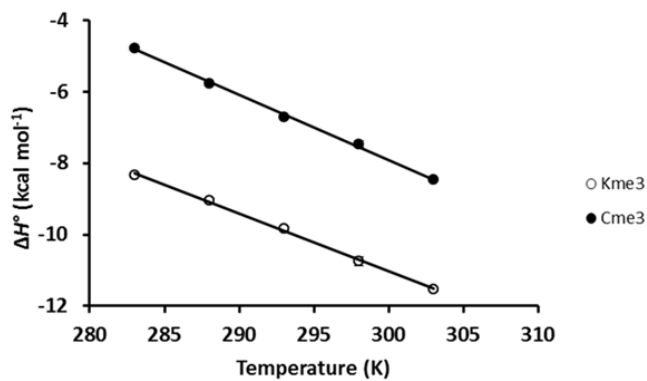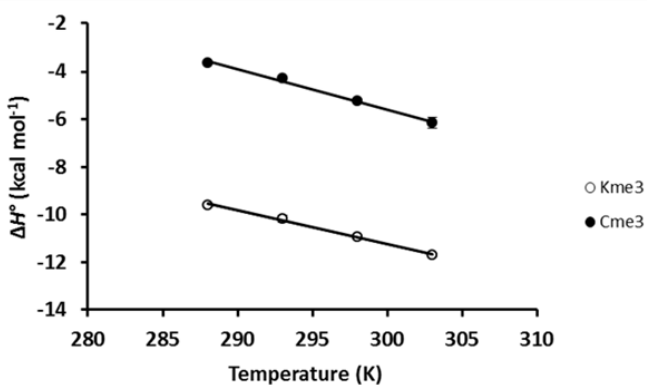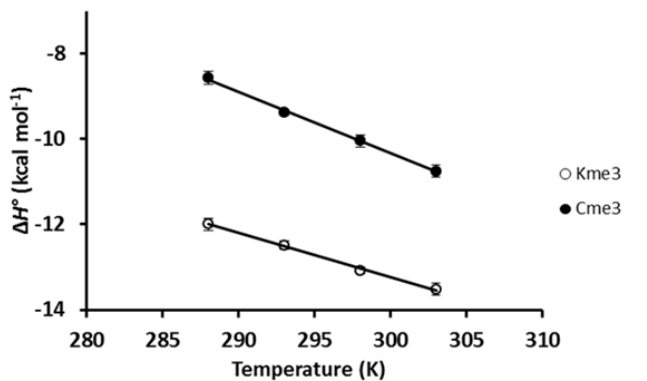

**Supplementary Figure 1. Observed enthalpies of binding as a function of temperature between 283 K (or 288 K) and 303 K.** Enthalpy of binding was measured by ITC with three independent titrations at each temperature. (a) JARID1A with H3K4me3 and H3C4me3, respectively; (b) TAF3 with H3K4me3 and H3C4me3, respectively; (c) BPTF with H3K4me3 and H3C4me3, respectively.

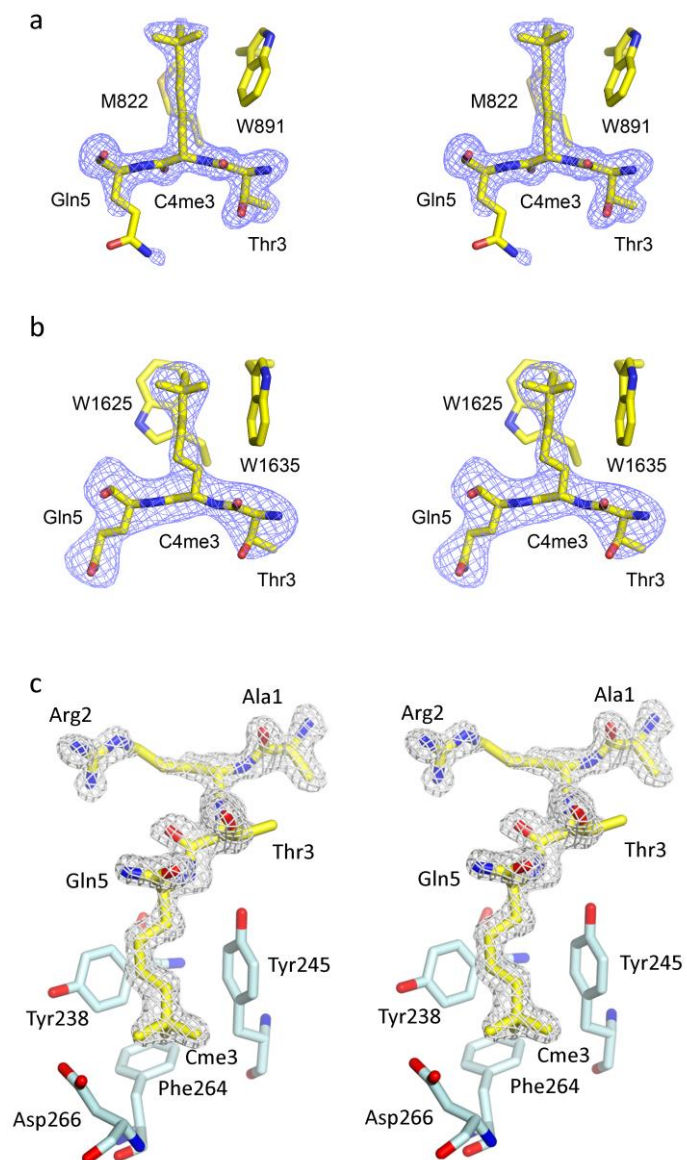

**Supplementary Figure 2. Electron density map, displayed as blue or white mesh, for H3C4me3 in the reader–H3C4me3 complexes. (a) TAF3–H3C4me3 (Fo-Fc electron density contoured to  $2.5\sigma$ , T3-C4-Q5 residues omitted for map production ); (b) JARID1A–H3C4me3 (Fo-Fc electron density contoured to  $1.5\sigma$ , residues T3-C4-Q5 omitted for map production, a sharpening B-factor of 60 is applied); (c) SGF29–H3C4me3 (Fo-Fc electron density contoured to  $3\sigma$ ).**

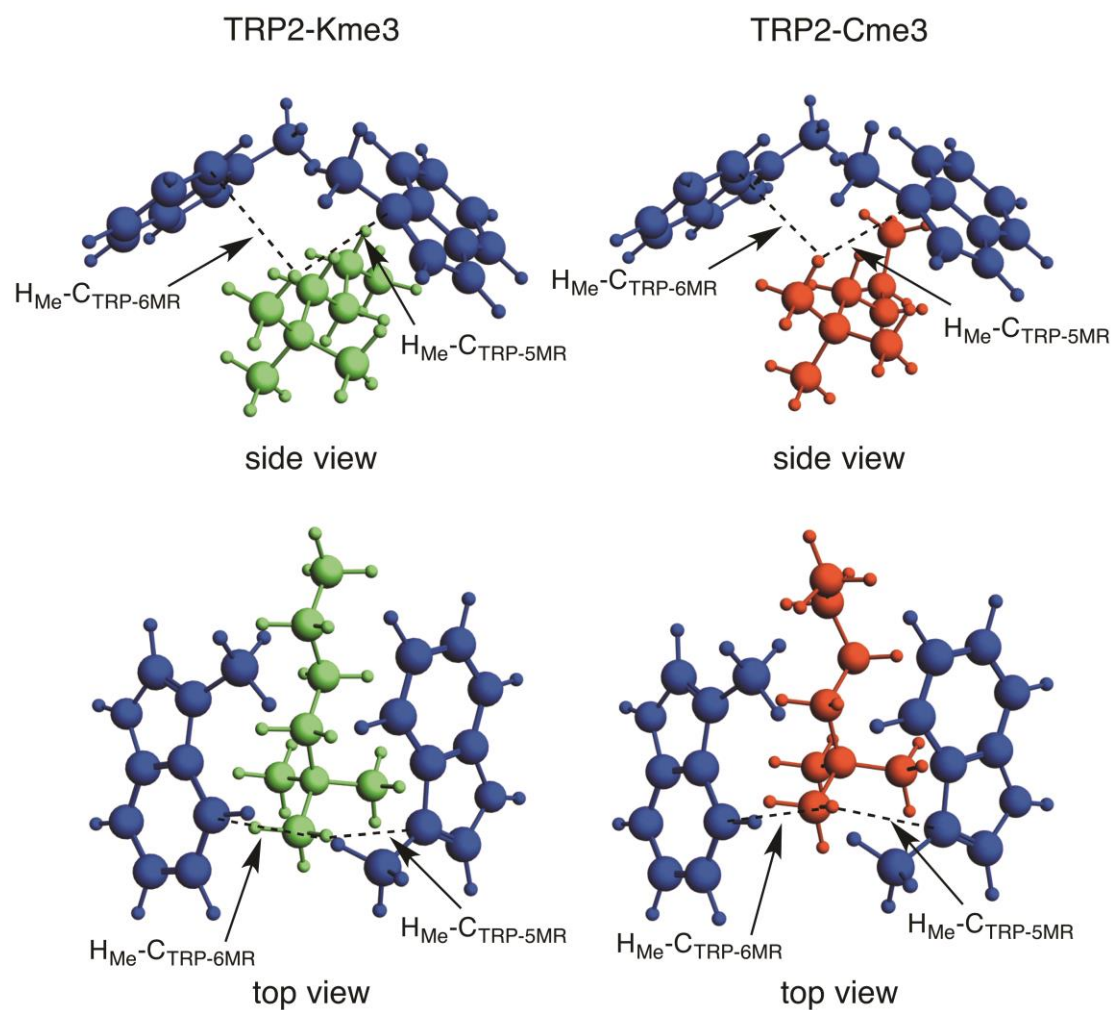

**Supplementary Figure 3. Structures of JARID1A-Kme3 and JARID1A-Cme3 model complexes. TRP2 in blue, Kme3 in green and Cme3 in red.**

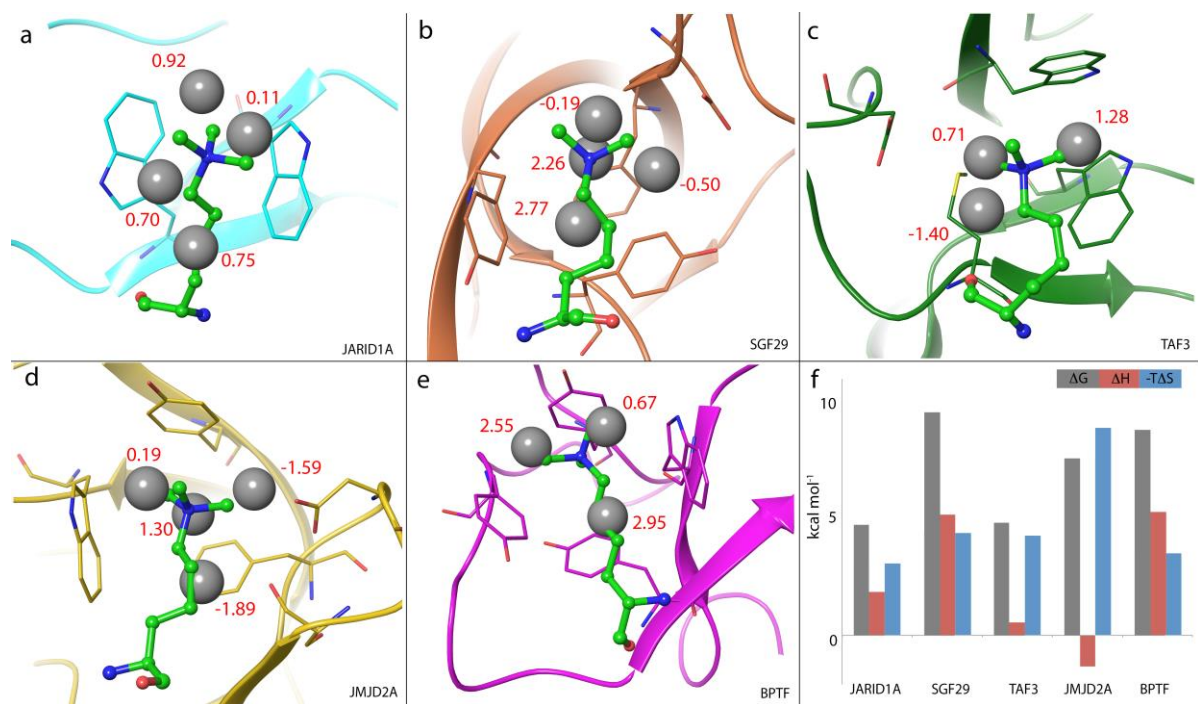

**Supplementary Figure 4. WaterMap calculations for the solvation enthalpies of aromatic cages of reader proteins. (a) JARID1A; (b) SGF29; (c) TAF3; (d) JMJD2A; (e) BPTF.**

Superimposed Kme3 side chain and water molecules are presented as green stick and grey spheres. Numbers (red) adjacent to grey spheres represent the value of the enthalpy ( $\Delta H$ ) for individual water molecule; (f) Thermodynamic parameters for the solvation of the aromatic cages of five reader proteins.

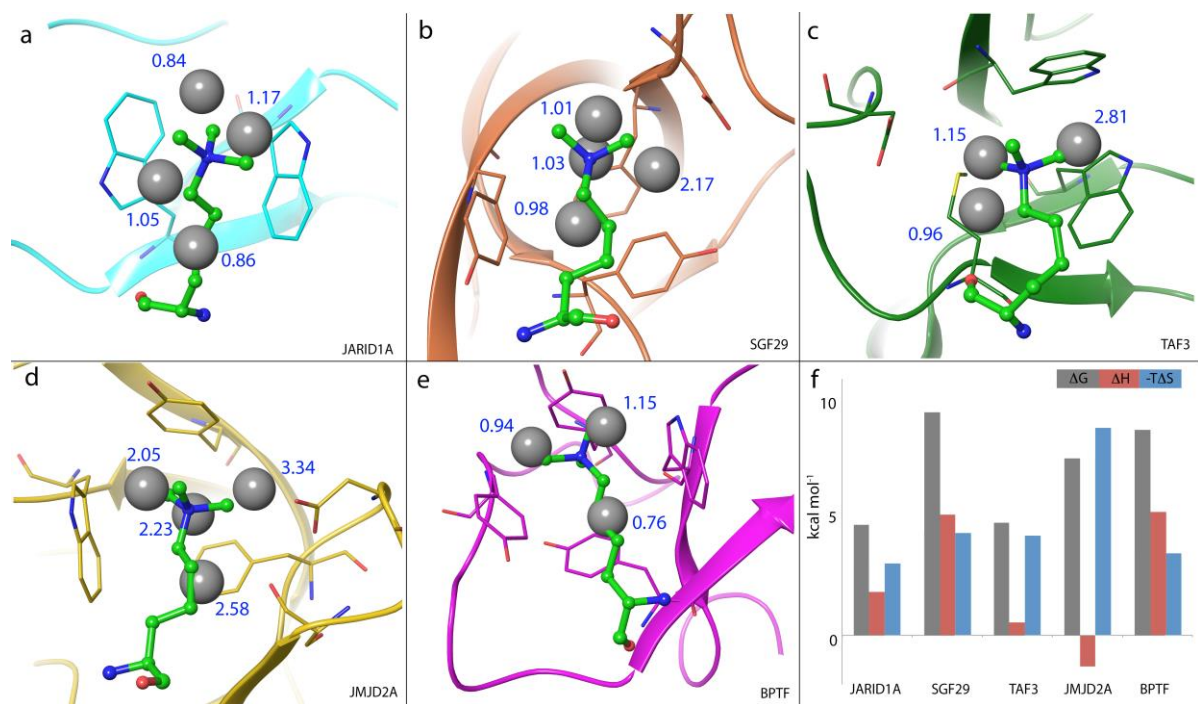

**Supplementary Figure 5. WaterMap calculations for the solvation entropies of aromatic cages of reader proteins. (a) JARID1A; (b) SGF29; (c) TAF3; (d) JMJD2A; (e) BPTF.**

Superimposed Kme3 side chain and water molecules are presented as green stick and grey spheres. Numbers (blue) adjacent to grey spheres represent the value of the entropy ( $-T\Delta S$ ) for individual water molecule; (f) Thermodynamic parameters for the solvation of the aromatic cages of five reader proteins.

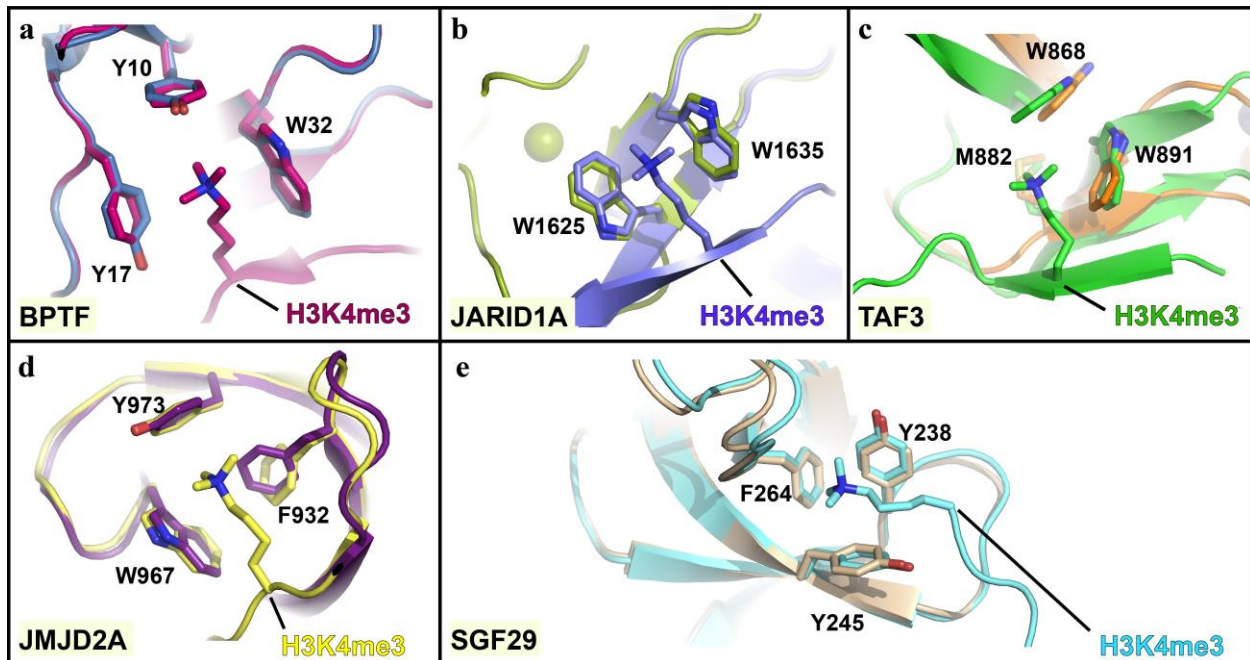

**Supplementary Figure 6. Comparison of free (unbound, apo) aromatic cages and Kme3-bound (holo) aromatic cages illustrates that aromatic cages are predominantly preformed for binding of the Kme3 substrate. (a) BPTF PHD finger; (b) JARID1A PHD finger; (c) TAF3 PHD finger; (d) JMJD2A Tudor; (e) SGF29 Tudor. Coordinates are taken from Protein Data Bank with entry numbers 2F6N (free) and 2F6J (complex) for BPTF; 2KGG (free) and 3GL6 (complex) for JARID1A; 2K16 (free) and 2K17 (complex) for TAF3; 2GF7 (free) and 2GFA (complex) for JMJD2A; 3LX7 (free) and 3MEA (complex) for SGF29, respectively.**

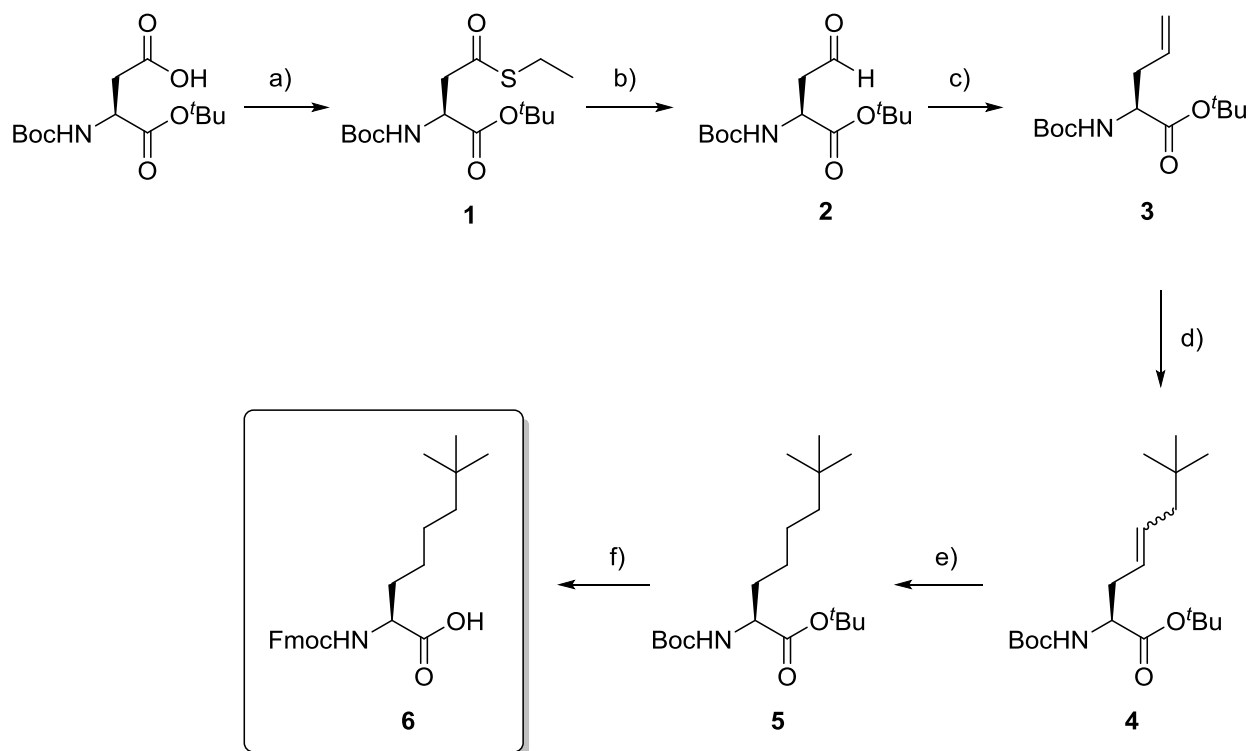

**Supplementary Figure 7. Synthetic scheme for the preparation of Fmoc-L-Cme3 (6).**

Conditions: a) DMAP, DCC, EtSH, CH<sub>2</sub>Cl<sub>2</sub>, 94%; b) 10% Pd/C, Et<sub>3</sub>SiH, CH<sub>2</sub>Cl<sub>2</sub>, 95%; c) methyl triphenyl phosphonium bromide, NaHMDS, CH<sub>2</sub>Cl<sub>2</sub>, 60%; d) 4,4-dimethylpent-1-ene, 2<sup>nd</sup> generation Grubbs catalyst, CH<sub>2</sub>Cl<sub>2</sub>, 50 °C, 56%; e) 10% Pd/C, H<sub>2</sub> (g), CH<sub>2</sub>Cl<sub>2</sub>, 95%; f) 1) TFA, CH<sub>2</sub>Cl<sub>2</sub>, 2) Fmoc-OSu, NaHCO<sub>3</sub>, H<sub>2</sub>O : 1,4-dioxane (1 : 1), 84%

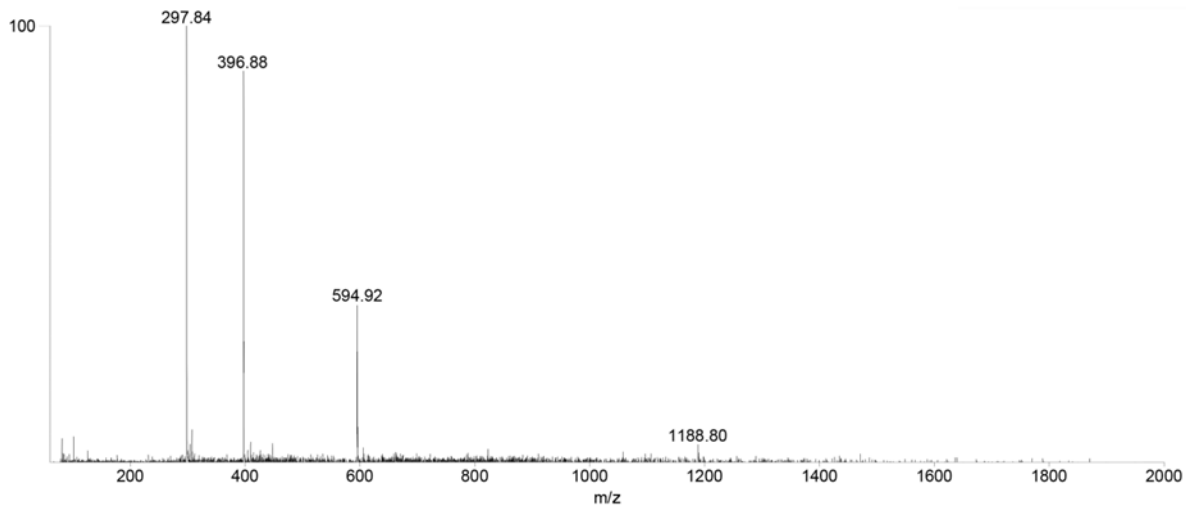

**Supplementary Figure 8. ESI-MS data of the 10-mer H3K4me3 peptide. 1188.80 [M<sup>+</sup>], 594.92 [M<sup>2+</sup>], 396.88 [M<sup>3+</sup>], 297.84 [M<sup>4+</sup>].**

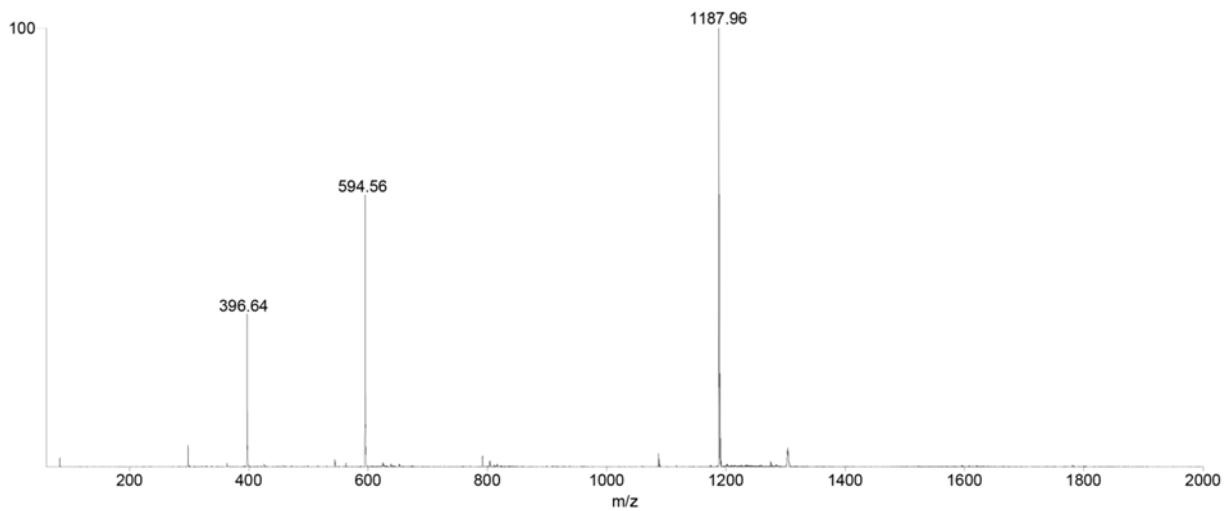

**Supplementary Figure 9. ESI-MS data of the 10-mer H3C4me3 peptide. 1187.96 [M<sup>+</sup>], 594.56 [M<sup>2+</sup>], 396.64 [M<sup>3+</sup>], 297.6 [M<sup>4+</sup>].**



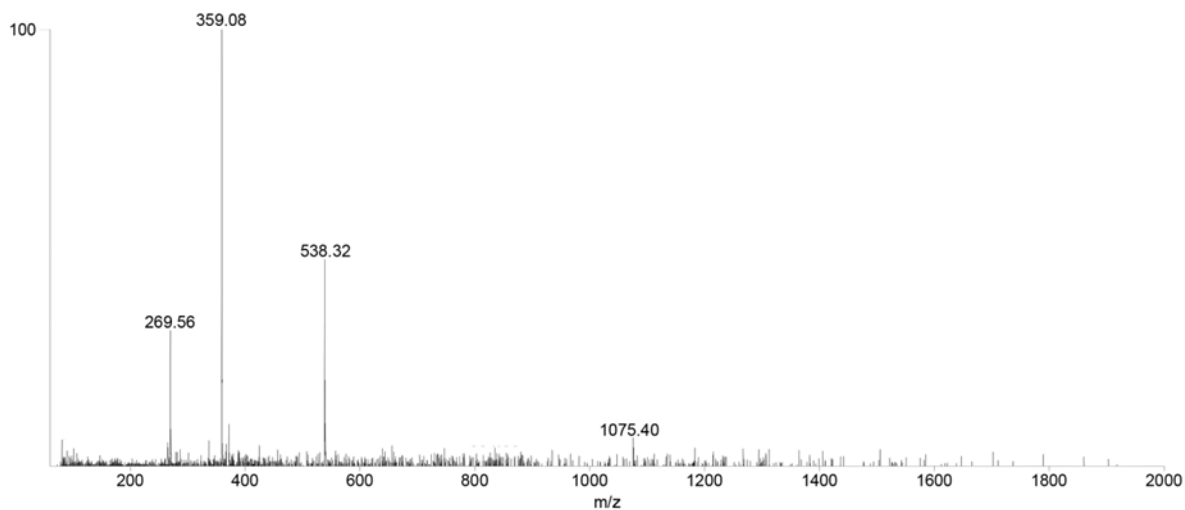

**Supplementary Figure 10. ESI-MS data of the 10-mer H3G4 peptide.** 1075.40 [M<sup>+</sup>], 538.32 [M<sup>2+</sup>], 359.08 [M<sup>3+</sup>], 269.56 [M<sup>4+</sup>].

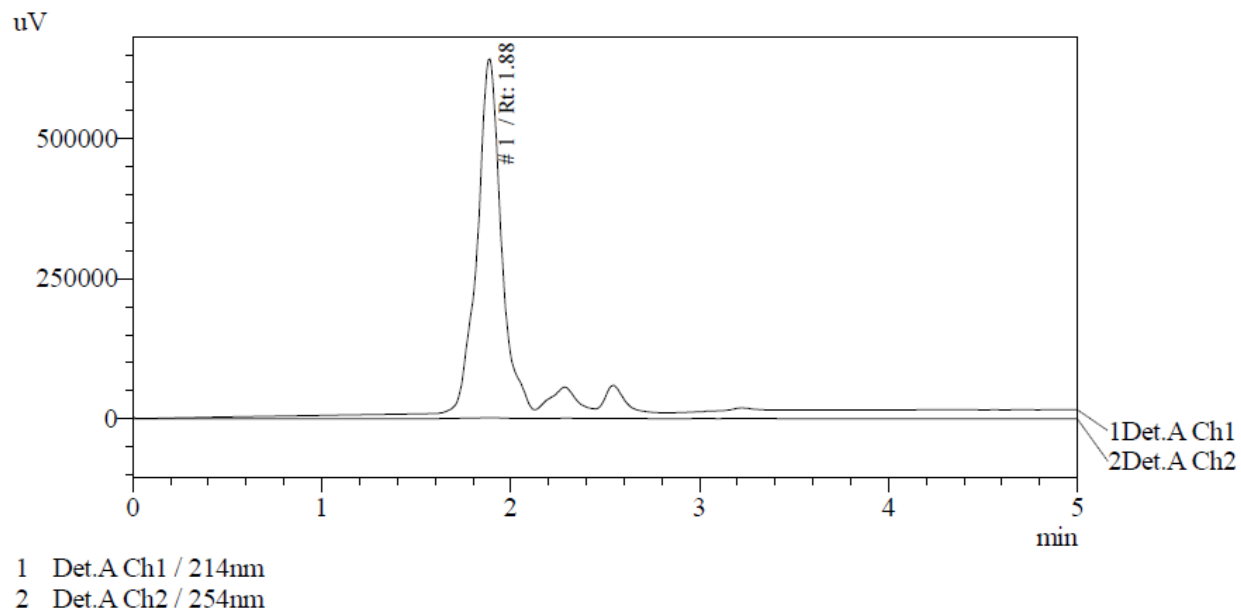

**Supplementary Figure 11. HPLC trace data of the 10-mer H3K4me3 peptide.** Peaks at 2.5 minutes derive from injection (blank).

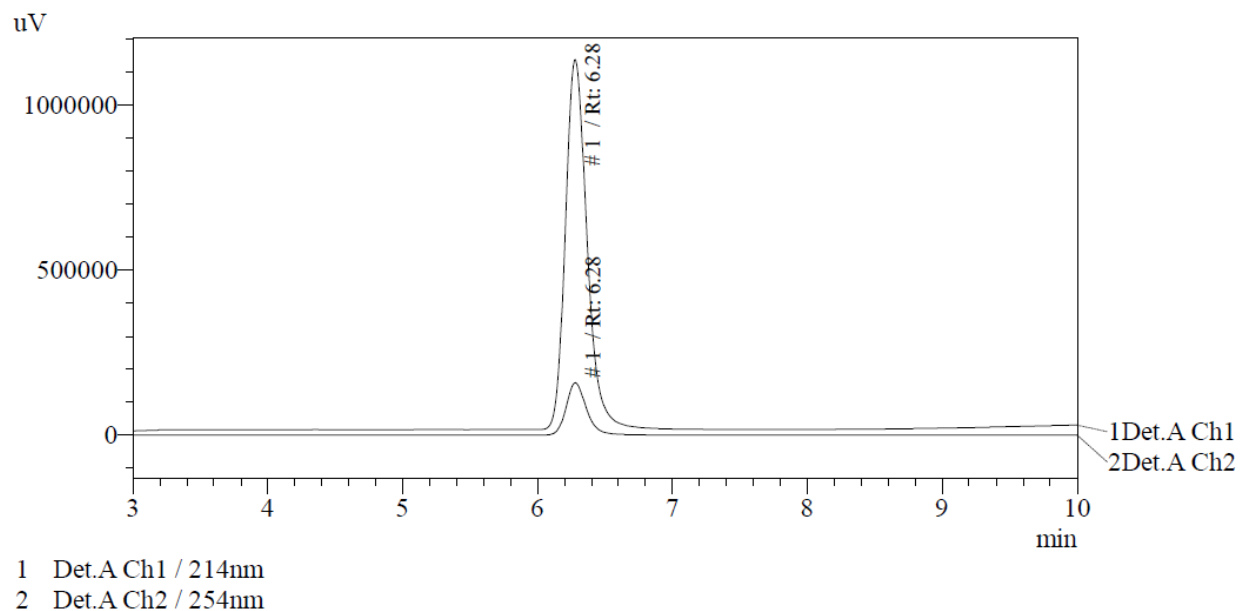

**Supplementary Figure 12. HPLC trace analysis of 10-mer H3C4me3 peptide.**

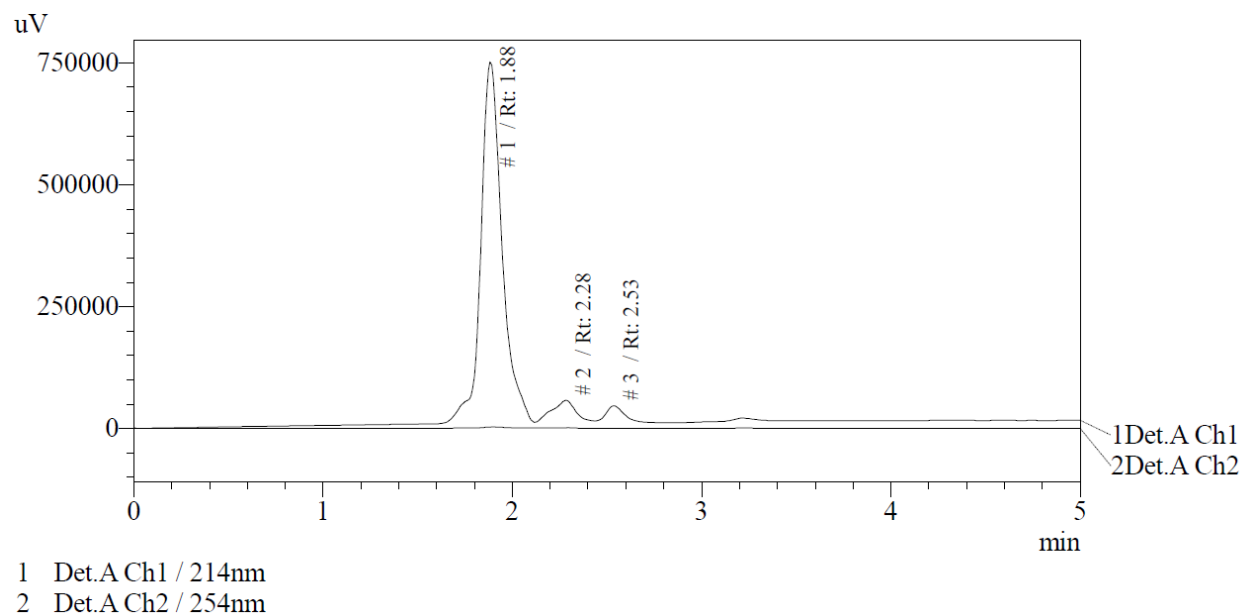

**Supplementary Figure 13. HPLC trace analysis of 10-mer H3G4 peptide. Peaks at 2.5 minutes derive from injection (blank).**

**Supplementary Table 1.** Cartesian coordinates of TRP2-Kme3 and TRP2-Cme3 systems, computed at BLYP-D3BJ/TZ2P using COSMO to simulate aqueous solvation and a constrained optimization to simulate the effect of the protein backbone.

TRP2-Kme3:

|   |               |               |              |
|---|---------------|---------------|--------------|
| C | -14.114000000 | -20.049000000 | -0.875000000 |
| C | -14.962000000 | -19.738000000 | 0.323000000  |
| C | -15.235000000 | -20.561000000 | 1.377000000  |
| C | -15.571000000 | -18.476000000 | 0.628000000  |
| C | -16.191000000 | -18.610000000 | 1.893000000  |
| C | -15.649000000 | -17.250000000 | -0.044000000 |
| N | -15.971000000 | -19.886000000 | 2.326000000  |
| C | -16.882000000 | -17.550000000 | 2.500000000  |
| C | -16.335000000 | -16.198000000 | 0.561000000  |
| C | -16.943000000 | -16.358000000 | 1.823000000  |
| H | -17.473000000 | -15.517000000 | 2.270000000  |
| H | -14.000000000 | -19.128000000 | -1.447000000 |
| H | -14.917000000 | -21.601000000 | 1.456000000  |
| H | -15.183000000 | -17.121000000 | -1.021000000 |
| H | -16.295000000 | -20.273000000 | 3.201000000  |
| H | -17.354000000 | -17.669000000 | 3.475000000  |
| H | -16.402000000 | -15.237000000 | 0.051000000  |
| H | -13.186000000 | -20.452000000 | -0.470000000 |
| C | -13.008000000 | -14.944000000 | -1.752000000 |
| C | -11.604000000 | -15.279000000 | -1.421000000 |
| C | -10.629000000 | -14.423000000 | -0.994000000 |
| C | -10.999000000 | -16.571000000 | -1.507000000 |
| C | -9.651000000  | -16.428000000 | -1.114000000 |
| C | -11.469000000 | -17.840000000 | -1.880000000 |
| N | -9.451000000  | -15.109000000 | -0.805000000 |
| C | -8.764000000  | -17.507000000 | -1.084000000 |
| C | -10.588000000 | -18.912000000 | -1.851000000 |
| C | -9.247000000  | -18.738000000 | -1.453000000 |
| H | -8.579000000  | -19.599000000 | -1.438000000 |
| H | -13.651000000 | -15.747000000 | -1.391000000 |
| H | -10.764000000 | -13.354000000 | -0.828000000 |
| H | -12.506000000 | -17.981000000 | -2.186000000 |
| H | -8.581000000  | -14.705000000 | -0.490000000 |
| H | -7.726000000  | -17.376000000 | -0.779000000 |
| H | -10.938000000 | -19.903000000 | -2.140000000 |
| H | -13.236000000 | -13.992000000 | -1.272000000 |
| H | -14.522374582 | -20.815706247 | -1.547885097 |
| H | -13.158423449 | -14.818069475 | -2.834003080 |

|   |               |               |             |
|---|---------------|---------------|-------------|
| C | -10.114752602 | -21.305220763 | 1.892377384 |
| C | -11.216790553 | -20.285805453 | 1.565697139 |
| C | -11.002507694 | -18.940388922 | 2.287874794 |
| C | -12.090102444 | -17.946438531 | 1.883398917 |
| N | -12.070579136 | -16.609009105 | 2.645799587 |
| C | -13.150209827 | -15.721875154 | 2.061139245 |
| C | -10.731973677 | -15.916856909 | 2.492497579 |
| C | -12.365551231 | -16.823749860 | 4.115733524 |
| H | -12.408951734 | -15.846708144 | 4.598931529 |
| H | -9.130774938  | -20.927740553 | 1.584711029 |
| H | -12.198761989 | -20.691389652 | 1.844793551 |
| H | -10.013332154 | -18.548608026 | 2.021388165 |
| H | -13.089556823 | -18.360771942 | 2.048366284 |
| H | -12.918787327 | -15.550085307 | 1.009793743 |
| H | -10.798479096 | -14.941374934 | 2.976931329 |
| H | -11.570405162 | -17.423783848 | 4.555007649 |
| H | -10.074709060 | -21.512398227 | 2.969877086 |
| H | -11.238229637 | -20.105747697 | 0.484787617 |
| H | -11.011890000 | -19.111207919 | 3.371339633 |
| H | -11.995495315 | -17.683123359 | 0.825941434 |
| H | -13.153012338 | -14.778635478 | 2.609325685 |
| H | -10.522561113 | -15.800602201 | 1.428638506 |
| H | -13.326128627 | -17.334212341 | 4.203429545 |
| H | -14.111323996 | -16.226695834 | 2.162298263 |
| H | -9.963428736  | -16.520728269 | 2.972373589 |
| H | -10.290718944 | -22.253949886 | 1.371226478 |

TRP2-Cme3:

|   |              |              |              |
|---|--------------|--------------|--------------|
| C | 45.969000000 | 21.413000000 | -4.047000000 |
| C | 47.156000000 | 21.171000000 | -4.864000000 |
| C | 47.384000000 | 21.634000000 | -6.121000000 |
| C | 48.352000000 | 20.472000000 | -4.468000000 |
| C | 49.246000000 | 20.533000000 | -5.547000000 |
| C | 48.745000000 | 19.803000000 | -3.313000000 |
| N | 48.632000000 | 21.237000000 | -6.550000000 |
| C | 50.512000000 | 19.945000000 | -5.503000000 |
| C | 50.004000000 | 19.224000000 | -3.277000000 |
| C | 50.867000000 | 19.300000000 | -4.360000000 |
| H | 51.850000000 | 18.833000000 | -4.293000000 |
| H | 46.179000000 | 21.047000000 | -3.042000000 |
| H | 46.683000000 | 22.231000000 | -6.704000000 |
| H | 48.077000000 | 19.736000000 | -2.454000000 |
| H | 49.030000000 | 21.433000000 | -7.457000000 |
| H | 51.191000000 | 20.001000000 | -6.354000000 |
| H | 50.323000000 | 18.697000000 | -2.378000000 |

|   |              |              |              |
|---|--------------|--------------|--------------|
| H | 45.791000000 | 22.486000000 | -4.112000000 |
| C | 48.458000000 | 21.019000000 | 0.442000000  |
| C | 48.203000000 | 22.440000000 | 0.724000000  |
| C | 48.923000000 | 23.255000000 | 1.539000000  |
| C | 47.166000000 | 23.243000000 | 0.161000000  |
| C | 47.321000000 | 24.540000000 | 0.673000000  |
| C | 46.133000000 | 22.992000000 | -0.739000000 |
| N | 48.402000000 | 24.523000000 | 1.513000000  |
| C | 46.469000000 | 25.580000000 | 0.327000000  |
| C | 45.294000000 | 24.026000000 | -1.087000000 |
| C | 45.465000000 | 25.305000000 | -0.550000000 |
| H | 44.779000000 | 26.100000000 | -0.840000000 |
| H | 48.122000000 | 20.804000000 | -0.572000000 |
| H | 49.787000000 | 22.946000000 | 2.127000000  |
| H | 45.992000000 | 21.996000000 | -1.159000000 |
| H | 48.758000000 | 25.315000000 | 2.029000000  |
| H | 46.599000000 | 26.579000000 | 0.742000000  |
| H | 44.483000000 | 23.845000000 | -1.793000000 |
| H | 49.529000000 | 20.858000000 | 0.570000000  |
| H | 47.917587245 | 20.339731840 | 1.117950276  |
| H | 45.074268746 | 20.888635016 | -4.411285300 |
| C | 45.938673402 | 25.400169396 | -4.801600761 |
| C | 47.219291385 | 26.197067425 | -5.110059086 |
| C | 48.318339411 | 26.067679959 | -4.033166971 |
| C | 48.803467145 | 24.620565562 | -3.798529201 |
| C | 50.163863734 | 24.473911953 | -3.054136190 |
| C | 50.393189646 | 22.976715818 | -2.753234187 |
| C | 50.146689730 | 25.252287263 | -1.718848139 |
| C | 51.324179650 | 24.987056753 | -3.940305728 |
| H | 51.220417800 | 26.055260778 | -4.170687694 |
| H | 46.142673849 | 24.324644598 | -4.789001017 |
| H | 46.964295557 | 27.260421539 | -5.229267853 |
| H | 47.938259503 | 26.479210225 | -3.086664777 |
| H | 48.890275509 | 24.102887082 | -4.767449173 |
| H | 50.390606339 | 22.383603674 | -3.675538007 |
| H | 50.051173620 | 26.333514434 | -1.882223403 |
| H | 51.360888027 | 24.436224541 | -4.890836872 |
| H | 45.534381872 | 25.668036767 | -3.816507433 |
| H | 47.626397082 | 25.864759449 | -6.077601665 |
| H | 49.164222311 | 26.702316747 | -4.332341408 |
| H | 48.040950132 | 24.073164023 | -3.227425802 |
| H | 49.603713613 | 22.584404511 | -2.101863226 |
| H | 51.078688756 | 25.075638238 | -1.163210023 |
| H | 52.288303084 | 24.848278156 | -3.431025882 |
| H | 51.357977767 | 22.826588619 | -2.247751921 |
| H | 49.309463792 | 24.924546312 | -1.092088497 |

H 45.162492112 25.585522346 -5.555364852

**Supplementary Table 2.** Overlaps between the MOs of TRP and either Kme3 or Cme3.<sup>[a]</sup>

| TRP MOs | Kme3/Cme3 MOs | JARID1A-Kme3 | JARID1A-Cme3 |
|---------|---------------|--------------|--------------|
| HOMO    | LUMO          | 0.012        | 0.002        |
| HOMO    | LUMO+1        | 0.006        | 0.009        |
| HOMO-1  | LUMO          | 0.028        | 0.015        |
| HOMO-1  | LUMO+1        | 0.006        | 0.000        |

[a] Computed at BLYP-D3BJ/TZ2P.

**Supplementary Table 3.** WaterMap calculations of thermodynamic parameters (in kcal mol<sup>-1</sup>) for the solvation of aromatic cages of five reader proteins. Calculations are based on the crystal structures of the apo form of reader proteins or holo form of reader proteins. Structures of reader proteins are obtained from PDB (see PDB IDs for apo and holo forms).

|         | Apo  | -TΔS | ΔH   | ΔG  | Holo | Kme3 | -TΔS | ΔH  | ΔG |
|---------|------|------|------|-----|------|------|------|-----|----|
| JARID1A | 2KGG | 1.4  | 0.8  | 2.2 | 2KGI | 2.8  | 1.7  | 4.3 |    |
| SGF29   | 3MEW | 2.9  | 6.8  | 9.7 | 3ME9 | 4.0  | 4.7  | 8.7 |    |
| TAF3    | 2K16 | 1.6  | 2.5  | 4.1 | 2K17 | 3.9  | 0.5  | 4.4 |    |
| JMJD2A  | 2GF7 | 6.0  | -0.8 | 5.2 | 2GFA | 8.1  | -1.2 | 6.9 |    |
| BPTF    | 2F6N | 3.5  | 3.6  | 7.1 | 2F6J | 3.2  | 4.8  | 8   |    |
